# Supplementary material for: Plant-Associated Neoscytalidium dimidiatum—Taxonomy, Host Range, Epidemiology, Virulence, and Management Strategies: A Comprehensive Review
Source: MDPI journal article supplement (doi:10.3390/jof9111048), 2023-10-26
Supplement: s1 [file s1]

Table S1. Data for selected isolates used in phylogenetic analyses, including culture collection number, substrate source, geographic origin, and GenBank accession numbers.

| Former taxonomic designation     | Culture collection number / Isolate name | Substrate                     | Country     | GenBank accession numbers |             |             |
|----------------------------------|------------------------------------------|-------------------------------|-------------|---------------------------|-------------|-------------|
|                                  |                                          |                               |             | ITS                       | <i>tef1</i> | <i>tub2</i> |
|                                  | Arp2-D                                   | <i>Vitis vinifera</i>         | Turkey      | MK813852                  | MK816355    | MK816354    |
|                                  | Kale4-C                                  | <i>Prunus armeniaca</i>       | Turkey      | MK788362                  | MK803351    | MK803352    |
|                                  | Nd_Fig01                                 | <i>Ficus carica</i>           | Turkey      | OL304243                  | OK788657    | OK788660    |
|                                  | Nd_Fig02                                 | <i>Ficus carica</i>           | Turkey      | OL304244                  | OK788658    | OK788661    |
|                                  | Nd_Fig03                                 | <i>Ficus carica</i>           | Turkey      | OL304245                  | OK788659    | OK788662    |
|                                  | Ol_Dr04                                  | <i>Olea europaea</i>          | Turkey      | OK416080                  | OK428813    | OK428827    |
|                                  | Ol_Hl02                                  | <i>Olea europaea</i>          | Turkey      | OK416072                  | OK428805    | OK428819    |
|                                  | Ol_Nz19                                  | <i>Olea europaea</i>          | Turkey      | OK416079                  | OK428812    | OK428826    |
|                                  | Nd_Pp01                                  | <i>Picea pungens</i>          | Turkey      | OK643641                  | OK666381    | OK666382    |
|                                  | CBS 125608                               | Human                         | Gabon       | MH863571                  | MT592260    | MT592752    |
|                                  | CBS 125609                               | Human                         | Gabon       | MH863572                  | MT592261    | MT592753    |
|                                  | CBS 125610                               | Human                         | Gabon       | MH863573                  | MT592262    | MT592754    |
|                                  | CBS 125617                               | Human, toe nail               | France      | MH863577                  | MT592264    | MT592756    |
|                                  | CBS 125619                               | Human, foot                   | France      | MT587533                  | MT592265    | MT592757    |
|                                  | CBS 125622                               | Human, foot                   | Martinique  | MT587537                  | MT592269    | MT592765    |
|                                  | CBS 125623                               | Human, toe nail               | Martinique  | MH863579                  | MT592270    | MT592766    |
|                                  | CBS 125695                               | Human                         | France      | KX464231                  | KX464764    | KX465065    |
|                                  | CBS 125808                               | Human, foot                   | Martinique  | MH863768                  | MT592271    | MT592767    |
|                                  | CBS 137.77                               | Cow, bovine foetus            | USA         | MT587535                  | MT592267    | MT592763    |
|                                  | CBS 145.78                               | Human, sole of foot           | UK          | KF531816                  | KF531795    | KF531796    |
|                                  | CBS 251.49                               | <i>Juglans regia</i>          | USA         | KF531819                  | KF531797    | KF531799    |
|                                  | CBS 312.90                               | Human, blood                  | Netherlands | MT587536                  | MT592268    | MT592764    |
|                                  | CBS 499.66                               | <i>Mangifera indica</i>       | Mali        | KF531820                  | KF531798    | KF531800    |
|                                  | CBS 601.85                               | Human                         | USA         | MT587538                  | MT592272    | MT592768    |
|                                  | CBS 662.77                               | Human                         | –           | MT587534                  | MT592266    | MT592758    |
|                                  | CMM 3566                                 | <i>Jatropha curcas</i>        | Brazil      | KF234551                  | KF226709    | KF254935    |
|                                  | CMM 3649                                 | <i>Jatropha curcas</i>        | Brazil      | KF234550                  | KF226707    | KF254934    |
|                                  | COUFAL 0144                              | <i>Nopalea cochenillifera</i> | Brazil      | MH251953                  | MH251961    | MH251969    |
|                                  | COUFAL 0145                              | <i>Nopalea cochenillifera</i> | Brazil      | MH251954                  | MH251962    | MH251970    |
|                                  | COUFAL 0146                              | <i>Nopalea cochenillifera</i> | Brazil      | MH251955                  | MH251963    | MH251971    |
|                                  | DE 1606                                  | <i>Dioscorea esculenta</i>    | China       | KY013660                  | KY349086    | KY349087    |
| <i>Neoscytalidium hylocereum</i> | PSU-HP01                                 | <i>Hylocereus polyrhizus</i>  | Thailand    | LC590859                  | LC590862    | LC647832    |

|                                           |                |                               |             |          |          |          |
|-------------------------------------------|----------------|-------------------------------|-------------|----------|----------|----------|
| <i>Neoscytalidium hylocereum</i>          | TSU-HP01       | <i>Hylocereus polyrhizus</i>  | Thailand    | LC590860 | LC590863 | LC647833 |
| <i>Neoscytalidium hylocereum</i>          | TSU-HP02       | <i>Hylocereus polyrhizus</i>  | Thailand    | LC590861 | LC590864 | LC647834 |
| <i>Neoscytalidium novaehollandiae</i>     | CBS 122070     | <i>Grevillia agrifolia</i>    | Australia   | EF585539 | EF585579 | MT592759 |
| <i>Neoscytalidium novaehollandiae</i>     | CBS 122071     | <i>Crotalaria medicaginea</i> | Australia   | EF585540 | EF585580 | MT592760 |
| <i>Neoscytalidium novaehollandiae</i>     | CBS 122072     | <i>Adansonia gibbosa</i>      | Australia   | EF585535 | EF585581 | MT592761 |
| <i>Neoscytalidium novaehollandiae</i>     | CBS 122610     | <i>Acacia synchronica</i>     | Australia   | EF585536 | EF585578 | MT592762 |
| <i>Neoscytalidium oculum</i>              | IOM 325287     | Human, eye                    | Mexico      | MG764431 | –        | –        |
| <i>Neoscytalidium orchidacearum</i>       | MFLUCC 12-0533 | Orchid, dead leaves           | Thailand    | KU179865 | –        | –        |
| <i>Botryosphaeria dothidea</i> (Outgroup) | CBS 115476     | <i>Prunus</i> sp.             | Switzerland | AY236949 | AY236898 | AY236927 |
